# Supplementary material for: Drug Exposure and Susceptibility of Pyrazinamide Correlate with Treatment Response in Pyrazinamide-Susceptible Patients with Multidrug-Resistant Tuberculosis
Source: MDPI journal article supplement (doi:10.3390/pharmaceutics16010144), 2024-01-21
Supplement: s1 [file s1]

Supplementary Materials

Table S1. Univariable analysis results for risk factors of Pyrazinamide exposure, susceptibility, and treatment response

| Characteristics           | Pyrazinamide exposure and susceptibility |                     |                     | Treatment response      |                         |                      |                         |
|---------------------------|------------------------------------------|---------------------|---------------------|-------------------------|-------------------------|----------------------|-------------------------|
|                           | MIC                                      | AUC                 | AUC/MIC             | 2-month culture         | 6-month culture         | Treatment            | Time to culture         |
|                           | OR(95%CI)                                | Coefficient(95%CI)  | Coefficient(95%CI)  | conversion<br>RR(95%CI) | conversion<br>RR(95%CI) | outcome<br>RR(95%CI) | conversion<br>HR(95%CI) |
| Area                      |                                          |                     |                     |                         |                         |                      |                         |
| Guizhou                   | 1                                        | 1                   | 1                   | 1                       | 1                       | 1                    | 1                       |
| Henan                     | 0.92(0.22-3.73)                          | 51.19(0.24-137.22)  | 1.35(-0.83-3.55)    | 1.64(0.93-2.90)         | 1.51(0.98-2.34)         | 1.19(0.88-1.6)       | 1.43(1.04-1.97)         |
| Jiangsu                   | 1.24(0.19-8.09)                          | 77.49(0.07-163.52)  | 2.22(0.02-4.41)*    | 1.21(0.65-2.25)         | 1.61(1.05-2.47)*        | 1.12(0.82-1.52)      | 1.34(0.80-2.23)         |
| Female                    | 1.46(0.35-5.92)                          | 93.06(0-162.18)*    | 1.87(0.09-3.66)*    | 1.04(0.67-1.61)         | 1.07(0.80-1.44)         | 1.06(0.84-1.33)      | 1.07(0.25-4.48)         |
| Age                       | 0.96(0.23-3.92)                          | -4.64(0--1.35)*     | -0.06(-0.15-0.01)   | 1(0.98-1.02)            | 1(0.98-1.01)            | 1.00(0.99-1.01)      | 1.00(0.45-2.23)         |
| Height                    | 0(0-0.01)*                               | -717.93(0--293.73)* | -7.68(-18.88-3.51)  | 5.89(0.28-123.36)       | 1.44(0.23-9.07)         | 1.55(0.40-6.05)      | 4.49(2.55-7.93)         |
| Weight                    | 0.96(0.23-3.91)*                         | -4.41(0--1.53)*     | -0.05(-0.12-0.02)   | 1.00(0.98-1.02)         | 1(0.99-1.01)            | 1.00(0.99-1.01)      | 1.01(0.68-1.50)         |
| BMI                       | 0.88(0.21-3.6)                           | -16.15(0.01--3.50)* | -0.23(-0.55-0.09)   | 1.00(0.92-1.09)         | 1(0.95-1.06)            | 1.02(0.98-1.06)      | 1.04(0.58-1.86)         |
| Current smoker            | 1.07(0.26-4.36)                          | -61.23(0.08-8.51)   | -1.06(-2.85-0.72)   | 0.68(0.44-1.06)         | 0.72(0.54-0.97)*        | 0.87(0.70-1.10)      | 0.77(0.51-1.16)         |
| Diabetes mellitus type II | 1.02(0.25-4.14)                          | -40.94(0.36-47.86)  | -1.26(-3.53-1.00)   | 1.02(0.59-1.76)         | 0.84(0.55-1.29)         | 0.79(0.55-1.13)      | 0.72(0.44-1.17)         |
| Pulmonary cavities        | 1.25(0.30-5.10)                          | 16.85(0.64-88.7)    | -0.54(-2.38-1.29)   | 0.94(0.6-1.49)          | 1.12(0.83-1.5)          | 0.9(0.70-1.15)       | 0.91(0.24-3.41)         |
| Severe disease            | 1.98(0.48-8.05)                          | -47.59(0.26-36.64)  | -2.96(-5.07--0.85)* | 0.38(0.16-0.88)*        | 0.52(0.3-0.89)*         | 0.51(0.32-0.81)*     | 0.35(0.35-0.35)*        |
| Time to positivity        | 0.83(0.20-3.39)*                         | 0.72(0.89-11.24)    | 0.52(0.27-0.78)*    | 1.13(1.06-1.21)*        | 1.08(1.03-1.13)*        | 1.07(1.03-1.10)*     | 1.16(1.16-1.16)*        |
| Pyrazinamide dose         | 1.06(0.26-4.33)                          | 9.97(0-15.83)*      | 0.14(-0.01-0.29)    | 0.98(0.95-1.02)         | 0.99(0.97-1.02)         | 0.99(0.97-1.01)      | 0.98(0.45-2.11)         |
| Group A drugs             |                                          |                     |                     |                         |                         |                      |                         |
| MFX+BDQ+LZD               | 1                                        | 1                   | 1                   | 1                       | 1                       | 1                    | 1                       |
| MFX+LZD                   | 1.77(0.43-7.22)                          | -55.85(0.20-29.62)  | -3.32(-5.42--1.22)* | 0.47(0.3-0.73)*         | 0.64(0.48-0.84)*        | 0.83(0.68-1.02)      | 0.47(0.47-0.47)*        |
| MFX                       | 3.81(0.58-24.83)*                        | -129.51(0--33.64)*  | -5.5(-7.85--3.14)*  | 0.37(0.19-0.68)*        | 0.39(0.24-0.63)*        | 0.50(0.34-0.74)*     | 0.23(0.23-0.23)*        |
| LZD                       | 11.61(1.18-113.64)                       | 55.19(0.52-223.53)  | -4.69(-8.83--0.56)* | 0.01(0.01-0.01)*        | 0.68(0.35-1.33)         | 0.66(0.34-1.28)      | 0.32(0.30-0.34)*        |

**Table S2.** Adverse events during the treatment in correspondence to the treatment categories.

| Adverse events*<br>(n=132)                   | All patients<br>(n=143) | No.(%) of patients treated with |         |        |        |
|----------------------------------------------|-------------------------|---------------------------------|---------|--------|--------|
|                                              | No.(%)                  | MFX+BDQ+LZD                     | MFX+LZD | MFX    | LZD    |
|                                              |                         | (n=37)                          | (n=7)   | (n=64) | (n=35) |
| Gastrointestinal disorders                   | 38(26.6)                | 11                              | 2       | 16     | 9      |
| Psychiatric disorders                        | 18(12.6)                | 5                               | 1       | 8      | 4      |
| Central nerve system disorders               | 6(4.2)                  | 2                               | 1       | 3      | 2      |
| Peripheral neuropathy                        | 21(14.7)                | 6                               | 2       | 3      | 5      |
| Liver injury                                 | 10(7.0)                 | 3                               | 0       | 5      | 2      |
| Kidney injury                                | 4(2.8)                  | 1                               | 0       | 2      | 1      |
| Anemia                                       | 11(7.7)                 | 7                               | 2       | 0      | 6      |
| OTcF prolongation                            | 16(11.2)                | 6                               | 0       | 5      | 1      |
| Others (pain, skin hyperpigmentation, et al) | 8(5.6)                  | 2                               | 0       | 4      | 2      |

MFX: Moxifloxacin; BDQ: Bedaquiline; LZD: Linezolid;

\*Adverse events were defined as follows:

Gastrointestinal disorders: the presence of nausea, vomiting, abdominal pain, diarrhea, epigastric discomfort, hematemesis, melena, and positive endoscopic findings;

Psychiatric disorders: the presence of depression, anxiety, psychosis, suicide, nightmares, and convulsion;

Central nervous system disorders: headache and seizure activity as reported by patient or witness;

Peripheral neuropathy: numbness, weakness, tingling, dizziness, burning/pain in the extremities, diagnosed by physician or electromyography;

Liver injury: alanine transaminase elevations above five times the upper limit of normal (ULN) or above three times the ULN with total bilirubin above 2 times the ULN;

Kidney injury: an abnormal estimated glomerular filtration rate based on serum creatinine using the Modification of Diet in Renal Disease formula;

Anaemia: hemoglobin level below 120 g/L for women and 130 g/L for men;

QTc prolongation: a corrected QT interval with the use of Fridericia's formula of more than 450 msec.
